# Supplementary material
Source: PubMed Central journal article supplement (PMC9969744)
Supplement: NIHMS1870327-supplement-34417593_GiorgioTrinchieri_Supplematerial.pdf [file NIHMS1870327-supplement-34417593_GiorgioTrinchieri_Supplematerial.pdf]

**Supplementary information**

---

**Neonatal exposure to a wild-derived  
microbiome protects mice against diet-  
induced obesity**

---

In the format provided by the  
authors and unedited

**Supplementary Table 1 | Pathogen Profile of Wildling and Lab Mice.**

| Pathogen                                        | Wildlings | Lab mice | Microbiome modified (MM)-Lab mice |
|-------------------------------------------------|-----------|----------|-----------------------------------|
| <i>Bacteria</i>                                 |           |          |                                   |
| <i>Citrobacter rodentium</i>                    | -         | -        | -                                 |
| <i>Clostridium piliforme</i>                    | -         | -        | -                                 |
| <i>Helicobacter bilis</i>                       | -         | -        | -                                 |
| <i>Helicobacter ganmani</i>                     | +         | +        | -                                 |
| <i>Helicobacter hepaticus</i>                   | +         | +        | -                                 |
| <i>Helicobacter mastomyrinus</i>                | -         | +        | -                                 |
| <i>Helicobacter rodentium</i>                   | -         | -        | -                                 |
| <i>Helicobacter spp.</i>                        | -         | -        | -                                 |
| <i>Helicobacter typhlonius</i>                  | +         | +        | -                                 |
| <i>Klebsiella oxytoca</i>                       | -         | -        | -                                 |
| <i>Klebsiella pneumoniae</i>                    | -         | -        | -                                 |
| <i>Pasteurella pneumotropica</i> biotype Jawetz | +         | +        | -                                 |
| <i>Pasteurella pneumotropica</i> biotype Heyl   | +         | +        | -                                 |
| <i>Pseudomonas aeruginosa</i>                   | -         | -        | -                                 |
| <i>Salmonella enterica</i>                      | -         | -        | -                                 |
| <i>Helminth</i>                                 |           |          |                                   |
| <i>Spironucleus muris</i>                       | +         | -        | -                                 |
| <i>Mites</i>                                    |           |          |                                   |
| <i>Myocoptes</i>                                | +         | -        | n.k.**                            |
| <i>Radfordia/Myobia</i>                         | +         | -        | n.k.**                            |
| <i>Myobia musculi</i>                           | +         | -        | n.k.**                            |
| <i>Pinworms</i>                                 |           |          |                                   |
| <i>Syphacia muris</i>                           | -         | -        | -                                 |
| <i>Syphacia obvelata</i>                        | +         | -        | -                                 |
| <i>Aspicularis tetraptera</i>                   | +         | -        | -                                 |
| <i>Protozoa</i>                                 |           |          |                                   |
| <i>Chilomastix spp.</i>                         | +         | -        | +                                 |
| <i>Entamoeba muris</i>                          | +         | +        | +                                 |
| <i>Tritrichomonas muris</i>                     | +         | -        | -                                 |
| <i>Viruses</i>                                  |           |          |                                   |
| Lymphocytic choriomeningitis virus (LCMV)       | -         | -        | -                                 |
| Mouse hepatitis virus (MHV) *                   | +         | -        | +                                 |
| Mouse norovirus (MNV)                           | +         | +        | +                                 |
| Mouse parvovirus (MPV)                          | -         | -        | -                                 |
| Mouse rotavirus (EDIM)                          | -         | -        | -                                 |
| Mouse theilovius (TMEV)                         | -         | -        | -                                 |

Pathogen testing was performed by IDEXX Laboratories (Westbrook, Maine).

More than 15 mice per group were tested. All data are PCR results, MHV is ELISA and PCR.

\* Wildlings and microbiome-modified lab mice tested PCR-negative and antibody-positive for MHV.

\*\* n.k., not known
